# Supplementary material for: Detecting Genetic Associations betweenATG5and Lupus Nephritis bytrans-eQTL
Source: Hindawi journal article supplement (doi:10.1155/2015/153132), 2015-01-01
Supplement: f1 [file 153132.f1.pdf]

**Supplementary Table 1 Association analyses of the positive *trans*-eSNPs genotypes and severity and outcome of patients with LN**

| SNPs       | Genotypes      | Age onset (years) | Quantity of Urine protein (g/l) | eGFR (ml/min/1.73 m <sup>2</sup> ) | Serum creatinine (umol/l) | C3 (g/l)  | SLEDAI      | Percentage of crescent (%) | Patient number of histologic classes (III + IV/ others) | Patients number of complete remission /partial remission/no remission | Development rate of ESRD (%) |
|------------|----------------|-------------------|---------------------------------|------------------------------------|---------------------------|-----------|-------------|----------------------------|---------------------------------------------------------|-----------------------------------------------------------------------|------------------------------|
| rs10878953 | GG             | 30.96±12.00       | 4.54±3.95                       | 85.39±42.38                        | 133.96±19.61              | 0.49±0.25 | 19.07±5.71  | 21.61±26.48                | 40/10                                                   | 0/7/34                                                                | 7.69                         |
|            | AG             | 32.01±11.18       | 4.70±3.51                       | 94.12±44.78                        | 110.34±101.64             | 0.49±0.25 | 18.85±5.90  | 11.53±20.39                | 93/40                                                   | 9/20/82                                                               | 37.50                        |
|            | AA             | 30.96±9.31        | 5.05±4.79                       | 93.48±39.88                        | 124.52±135.82             | 0.47±0.23 | 18.47±8.10  | 14.93±22.91                | 53/23                                                   | 2/10/55                                                               | 31.58                        |
|            | <i>P</i> value | 0.72              | 0.75                            | 0.66                               | 0.46                      | 0.87      | 0.89        | 0.03                       | 0.36                                                    | 0.29                                                                  | 0.14                         |
| rs1391438  | GG             | 31.58±11.59       | 4.81±3.61                       | 84.50±40.69                        | 113.05±90.64              | 0.51±0.22 | 18.68±8.58  | 12.19±18.48                | 49/16                                                   | 2/13/45                                                               | 29.41                        |
|            | AG             | 31.10±10.30       | 5.00±4.45                       | 94.90±44.92                        | 127.55±142.27             | 0.49±0.25 | 18.71±5.74  | 14.55±23.44                | 92/45                                                   | 5/16/89                                                               | 32.35                        |
|            | AA             | 32.30±11.18       | 4.19±3.18                       | 97.00±40.45                        | 104.64±78.08              | 0.45±0.23 | 19.08±5.47  | 16.99±25.08                | 45/12                                                   | 4/8/37                                                                | 23.08                        |
|            | <i>P</i> value | 0.76              | 0.44                            | 0.36                               | 0.45                      | 0.38      | 0.94        | 0.50                       | 0.19                                                    | 0.60                                                                  | 0.93                         |
| rs1391441  | AA             | 32.51±11.42       | 4.75±3.51                       | 84.41±41.74                        | 114.14±93.20              | 0.53±0.22 | 19.10±8.40  | 11.98±18.60                | 45/15                                                   | 2/12/41                                                               | 27.78                        |
|            | AG             | 30.69±10.27       | 5.11±4.51                       | 94.32±44.86                        | 128.59±142.01             | 0.47±0.25 | 18.54±6.02  | 14.96±23.44                | 94/44                                                   | 5/16/92                                                               | 33.33                        |
|            | GG             | 32.25±11.38       | 4.05±3.06                       | 97.92±39.52                        | 101.66±75.91              | 0.48±0.25 | 18.93±5.35  | 15.93±24.59                | 47/14                                                   | 4/9/38                                                                | 23.08                        |
|            | <i>P</i> value | 0.43              | 0.22                            | 0.35                               | 0.34                      | 0.31      | 0.85        | 0.59                       | 0.35                                                    | 0.58                                                                  | 0.82                         |
| rs155098   | GG             | 32.94±12.18       | 4.51±3.05                       | 98.62±43.91                        | 113.95±113.59             | 0.49±0.25 | 17.80±6.93  | 20.34±23.06                | 25/5                                                    | 3/5/18                                                                | 20.00                        |
|            | AG             | 31.12±10.24       | 4.88±3.84                       | 88.69±45.56                        | 132.72±142.18             | 0.48±0.22 | 18.10±6.58  | 15.81±25.51                | 84/39                                                   | 4/20/83                                                               | 30.77                        |
|            | AA             | 31.52±11.12       | 4.71±4.40                       | 94.99±39.82                        | 103.63±82.66              | 0.49±0.26 | 19.93±6.34  | 11.29±18.20                | 77/29                                                   | 4/12/70                                                               | 32.14                        |
|            | <i>P</i> value | 0.70              | 0.88                            | 0.57                               | 0.19                      | 0.97      | 0.12        | 0.12                       | 0.26                                                    | 0.42                                                                  | 0.87                         |
| rs17008504 | AA             | 38.60±3.05        | 1.85±1.31                       | 98.72±30.09                        | 74.40±13.45               | 0.42±0.16 | 19.00±11.47 | 17.91±14.42                | 3/1                                                     | 1/0/4                                                                 | 0.00                         |
|            | AT             | 30.76±11.03       | 4.53±3.06                       | 96.22±45.98                        | 110.62±102.06             | 0.48±0.23 | 18.66±5.43  | 16.38±26.16                | 67/28                                                   | 4/13/58                                                               | 31.58                        |

|           |                |             |           |              |               |           |            |             |        |           |       |
|-----------|----------------|-------------|-----------|--------------|---------------|-----------|------------|-------------|--------|-----------|-------|
|           | TT             | 31.70±10.79 | 4.99±4.45 | 89.85±41.40  | 125.18±128.96 | 0.49±0.25 | 18.85±7.02 | 13.24±20.50 | 116/44 | 6/24/109  | 29.55 |
|           | <i>P</i> value | 0.27        | 0.17      | 0.66         | 0.46          | 0.72      | 0.98       | 0.53        | 0.91   | 0.51      | 1.00  |
| rs2271100 | GG             | 28.36±12.75 | 4.64±4.04 | 100.75±50.80 | 125.45±94.40  | 0.44±0.29 | 19.33±5.68 | 9.73±10.80  | 10/1   | 0/2/7     | 50.00 |
|           | AG             | 33.97±11.30 | 4.58±3.87 | 92.21±41.38  | 117.41±125.55 | 0.50±0.24 | 20.13±7.75 | 13.10±21.39 | 43/16  | 3/9/44    | 28.57 |
|           | AA             | 30.85±10.45 | 4.84±4.05 | 92.00±43.33  | 118.98±118.43 | 0.48±0.24 | 18.31±6.15 | 15.22±23.57 | 133/56 | 8/26/120  | 28.26 |
|           | <i>P</i> value | 0.08        | 0.91      | 0.87         | 0.98          | 0.74      | 0.21       | 0.64        | 0.39   | 0.98      | 0.71  |
| rs6056923 | GG             | -           | -         | -            | -             | -         | -          | -           | -      | -         | -     |
|           | AG             | 34.12±12.18 | 3.83±3.32 | 78.64±34.27  | 132.55±136.68 | 0.57±0.28 | 16.94±4.07 | 12.36±26.23 | 16/8   | 1/2/21    | 28.57 |
|           | AA             | 31.28±10.64 | 4.84±4.05 | 93.53±43.44  | 117.76±117.46 | 0.48±0.24 | 18.96±6.72 | 14.66±22.35 | 169/65 | 10/35/149 | 30.36 |
|           | <i>P</i> value | 0.20        | 0.25      | 0.27         | 0.60          | 0.13      | 0.23       | 0.64        | 0.64   | 0.61      | 1.00  |
| rs7081173 | AA             | 32.66±12.12 | 4.82±4.39 | 91.39±42.79  | 100.08±65.75  | 0.50±0.27 | 19.28±7.71 | 16.59±23.78 | 44/21  | 4/10/42   | 16.67 |
|           | AC             | 31.69±9.60  | 4.69±4.14 | 94.19±43.45  | 123.83±130.54 | 0.48±0.24 | 18.86±6.09 | 12.85±22.37 | 91/38  | 5/15/85   | 38.71 |
|           | CC             | 29.93±11.65 | 4.86±3.28 | 89.36±42.87  | 128.09±133.98 | 0.48±0.20 | 18.06±6.28 | 15.74±22.21 | 51/14  | 2/12/44   | 26.67 |
|           | <i>P</i> value | 0.32        | 0.95      | 0.85         | 0.34          | 0.83      | 0.62       | 0.49        | 0.37   | 0.74      | 0.31  |
| rs712377  | CC             | 30.18±10.55 | 4.29±3.86 | 101.82±47.03 | 95.58±60.01   | 0.52±0.23 | 20.69±5.37 | 15.21±24.30 | 29/10  | 1/7/26    | 27.27 |
|           | AC             | 31.57±10.54 | 5.23±4.42 | 85.21±40.39  | 123.18±119.80 | 0.48±0.25 | 18.27±6.96 | 14.78±21.56 | 104/36 | 5/19/93   | 29.73 |
|           | AA             | 32.00±11.49 | 4.15±3.06 | 99.85±43.63  | 122.06±136.13 | 0.48±0.24 | 18.82±6.23 | 13.65±23.98 | 53/27  | 5/11/52   | 31.25 |
|           | <i>P</i> value | 0.68        | 0.11      | 0.09         | 0.45          | 0.69      | 0.18       | 0.92        | 0.42   | 0.84      | 1.00  |
| rs7529592 | GG             | 32.75±10.87 | 2.62±2.94 | 106.91±31.08 | 73.00±3.92    | 0.41±0.14 | 19.33±2.08 | 6.13±10.49  | 3/1    | 0/1/3     | 50.00 |
|           | AG             | 30.40±10.04 | 4.77±3.27 | 96.22±45.02  | 142.81±177.68 | 0.41±0.20 | 19.80±7.93 | 11.00±21.56 | 30/8   | 1/6/27    | 37.50 |
|           | AA             | 31.67±10.98 | 4.81±4.13 | 91.50±42.98  | 115.89±107.39 | 0.50±0.25 | 18.61±6.38 | 15.25±22.97 | 153/64 | 10/30/141 | 27.78 |
|           | <i>P</i> value | 0.76        | 0.56      | 0.76         | 0.35          | 0.12      | 0.65       | 0.43        | 0.64   | 0.91      | 0.58  |
| rs7751485 | CC             | 34.97±10.95 | 4.57±3.00 | 91.40±41.57  | 89.61±53.05   | 0.49±0.24 | 20.35±4.96 | 10.66±15.42 | 17/9   | 2/4/18    | 12.50 |

|                |             |           |             |               |           |            |             |       |         |       |
|----------------|-------------|-----------|-------------|---------------|-----------|------------|-------------|-------|---------|-------|
| CG             | 30.76±11.15 | 4.32±3.52 | 96.75±40.62 | 108.53±102.48 | 0.49±0.26 | 19.16±6.06 | 14.01±20.91 | 88/38 | 5/16/86 | 34.15 |
| GG             | 31.47±10.29 | 5.36±4.65 | 88.05±45.83 | 138.98±144.12 | 0.49±0.22 | 17.96±7.37 | 16.00±25.92 | 81/26 | 4/17/67 | 26.67 |
| <i>P</i> value | 0.17        | 0.13      | 0.50        | 0.07          | 1.00      | 0.21       | 0.53        | 0.47  | 0.79    | 0.51  |

(a) ESRD: end stage renal disease; LN: lupus nephritis, SLEDAI: systemic lupus nephritis disease activity index;

(b) Response to treatment was measured by changes in proteinuria, and complete remission was defined as proteinuria <0.3g per 24 hours while partial remission defined as a decrease in proteinuria by at least 50% from the initial value and <3.5g per 24 hours. Development of end stage renal disease was defined as dialysis or death.

**Supplementary Table 2 Function prediction of the positive *trans*-eSNPs in RegulomeDB database**

| Chromosome | Locus              | SNP         | r <sup>2</sup> | RegulomeDB score |
|------------|--------------------|-------------|----------------|------------------|
| 2          | ITGA4(rs155098)    | rs155099    | 1              | 3a               |
| 4          | AGA(rs2271100)     | rs2271100   | 1              | 1f               |
| 4          | AGA                | rs11726465  | 0.97           | 3a               |
| 4          | TET2(rs1391441)    | rs1391441   | 1              | 4                |
| 6          | CDKAL1(rs7751485)  | rs4479917   | 0.96           | 2b               |
| 6          | CDKAL1             | rs4315997   | 0.97           | 4                |
| 10         | LINP(rs7081173)    | rs7081173   | 1              | 1f               |
| 10         | LINP               | rs10788613  | 0.99           | 1f               |
| 10         | LINP               | rs139608926 | 0.95           | 4                |
| 12         | CPSF6(10878953)    | rs11177577  | 1              | 1f               |
| 12         | CPSF6              | rs138867102 | 0.98           | 3a               |
| 14         | SLC25A21(rs712377) | rs1154121   | 0.9            | 4                |
| 14         | SLC25A21           | rs848045    | 0.82           | 4                |
| 20         | PAK7(rs6056923)    | rs36001827  | 1              | 4                |

(a)*trans*-eSNP: *trans*-expression single nucleotide polymorphism;

(b)Only the SNPs with RegulomeDB scores between 1 and 4 were listed.

**Supplementary Table 3 The scoring standard of RegulomeDB database**

| <b>Score</b> | <b>Supporting data</b>                                                      |
|--------------|-----------------------------------------------------------------------------|
| 1a           | eQTL + TF binding + matched TF motif + matched DNase Footprint + DNase peak |
| 1b           | eQTL + TF binding + any motif + DNase Footprint + DNase peak                |
| 1c           | eQTL + TF binding + matched TF motif + DNase peak                           |
| 1d           | eQTL + TF binding + any motif + DNase peak                                  |
| 1e           | eQTL + TF binding + matched TF motif                                        |
| 1f           | eQTL + TF binding / DNase peak                                              |
| 2a           | TF binding + matched TF motif + matched DNase Footprint + DNase peak        |
| 2b           | TF binding + any motif + DNase Footprint + DNase peak                       |
| 2c           | TF binding + matched TF motif + DNase peak                                  |
| 3a           | TF binding + any motif + DNase peak                                         |
| 3b           | TF binding + matched TF motif                                               |
| 4            | TF binding + DNase peak                                                     |
| 5            | TF binding or DNase peak                                                    |
| 6            | other                                                                       |

(a) eQTL: expression quantitative trait loci, TF: transcriptional factor.

**Supplementary Table 4 Function prediction of the positive *trans*-eSNPs in HaploReg database v3**

| Gene     | SNP        | Function annotation <sup>a</sup> | Promoter histone marks <sup>b</sup> | Enhancer histone marks <sup>b</sup> | DNase <sup>b</sup> | Protein bound <sup>b</sup> | Regulatory motifs <sup>c</sup> |
|----------|------------|----------------------------------|-------------------------------------|-------------------------------------|--------------------|----------------------------|--------------------------------|
| ANKRD50  | rs17008504 | -                                | 0                                   | 2                                   | 0                  | 0                          | 6                              |
| AGA      | rs2271100  | intronic                         | 0                                   | 3                                   | 3                  | 3                          | 29                             |
| PAK7     | rs6056923  | intronic                         | 3                                   | 2                                   | 7                  | 0                          | 121                            |
| TET2     | rs1391441  | intronic                         | 0                                   | 6                                   | 2                  | 0                          | 27                             |
| TET2     | rs1391438  | intronic                         | 0                                   | 6                                   | 2                  | 0                          | 27                             |
| SLC25A21 | rs712377   | intronic                         | 0                                   | 4                                   | 2                  | 1                          | 63                             |
| CPSF6    | rs10878953 | intronic,<br>synonymous          | 2                                   | 3                                   | 5                  | 2                          | 29                             |
| AKNAD1   | rs7529592  | intronic                         | 0                                   | 0                                   | 0                  | 0                          | 0                              |
| ITGA4    | rs155098   | intronic                         | 0                                   | 0                                   | 1                  | 1                          | 39                             |
| CDKAL1   | rs7751485  | intronic                         | 0                                   | 4                                   | 2                  | 1                          | 27                             |
| LIPN     | rs7081173  | intronic, missense               | 0                                   | 3                                   | 2                  | 1                          | 34                             |

(a) SNP: single nucleotide polymorphism;

(b)<sup>a</sup>The types of function annotation of the positive eSNPs and SNPs in strong linkage disequilibrium with them;

(c) <sup>b</sup>The number of cell types for validating the regions of promoter histone, enhancer histone, DNase, or transcriptional factor binding;

(d) <sup>c</sup>The numbers of regulatory motifs.
